# Supplementary material for: Canonical NF-κB p65, but Not p105, Contributes to IL-1β-Induced IL-8 Expression in Cardiac Fibroblasts
Source: PubMed Central journal article supplement (PMC9065446; doi:10.3389/fimmu.2022.863309), 2022-04-20
Supplement: DataSheet_1.pdf [file DataSheet_1.pdf]

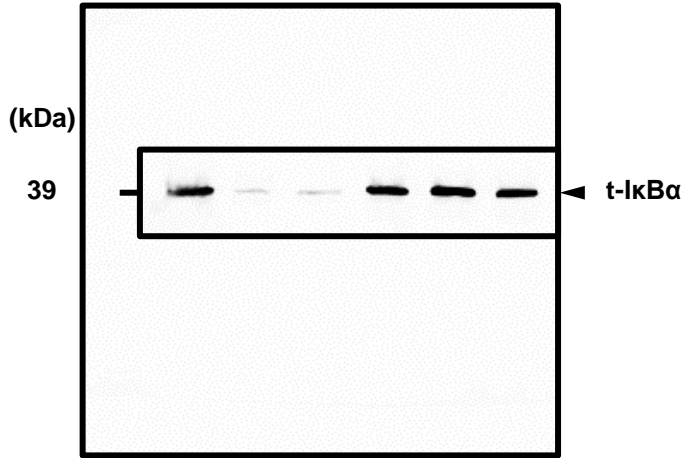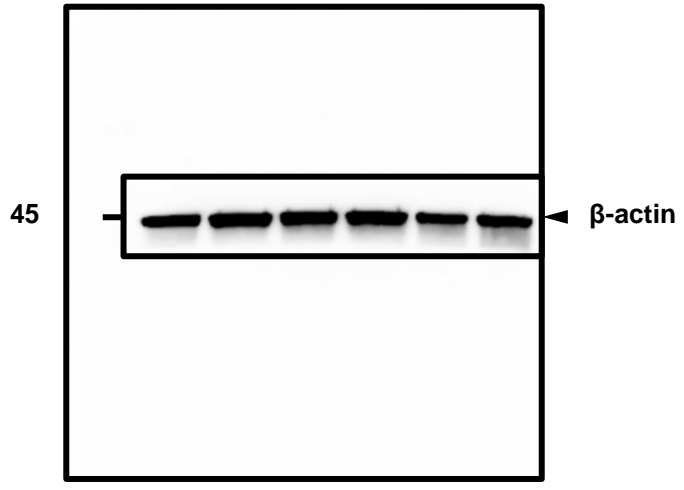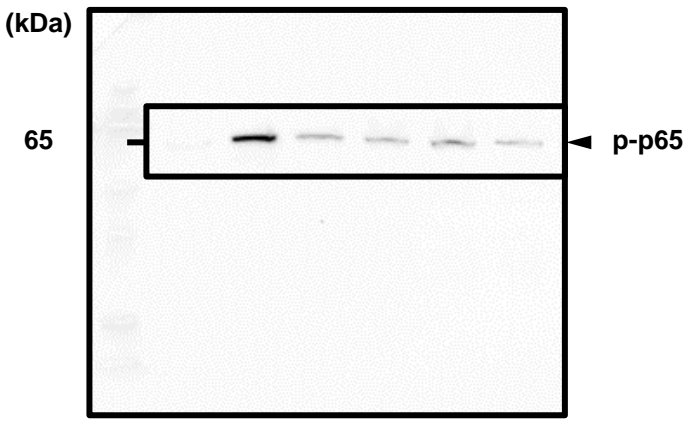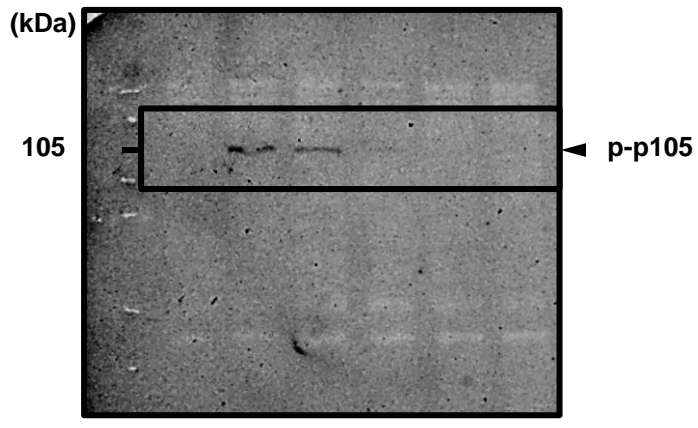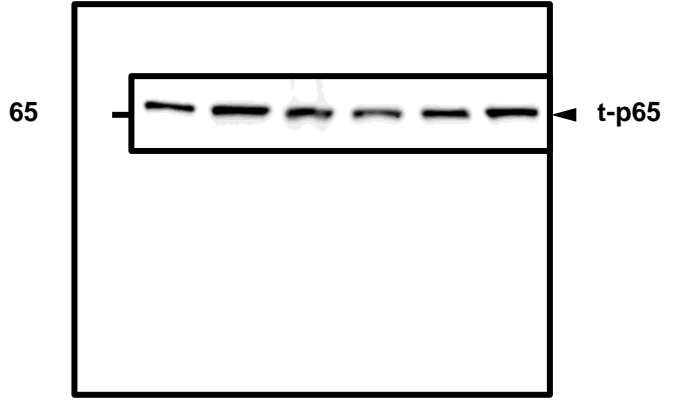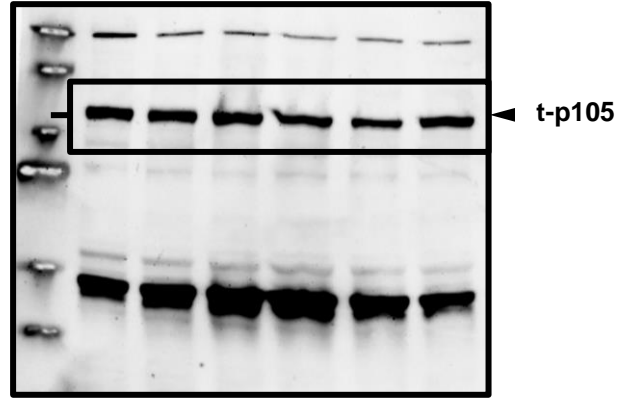

Uncropped images for the blots shown in Fig. 3a

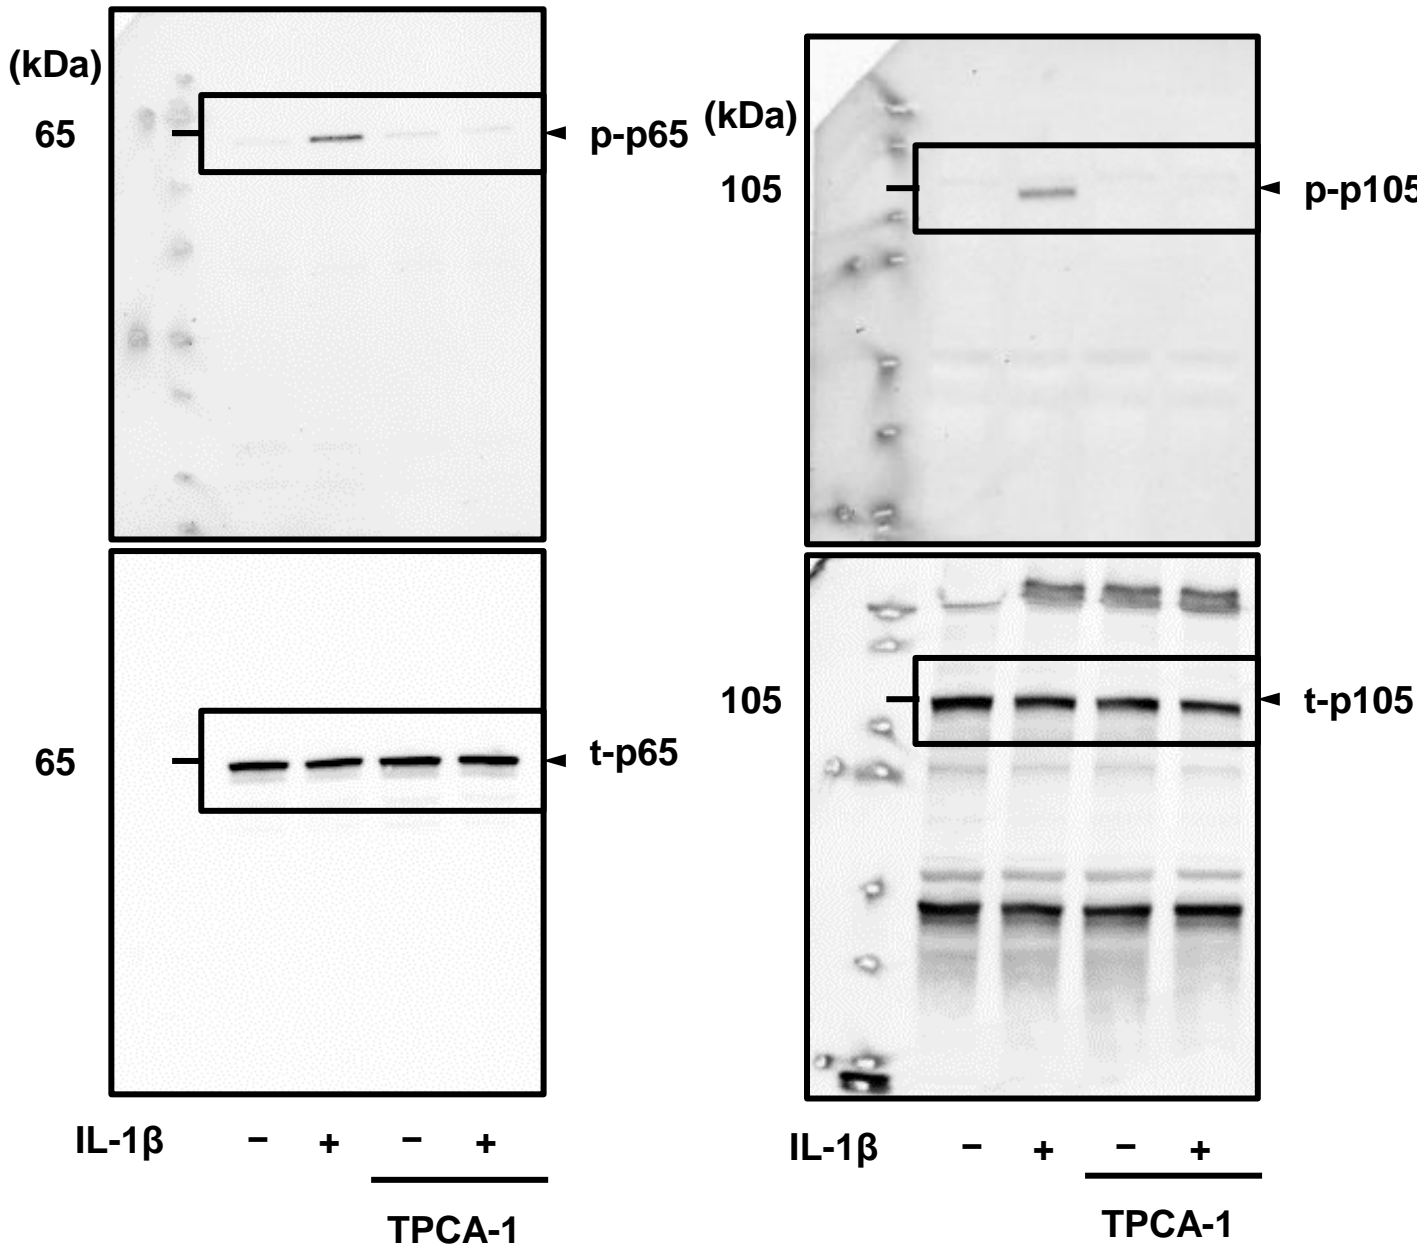

Uncropped images for the blots shown in Fig. 4a and c

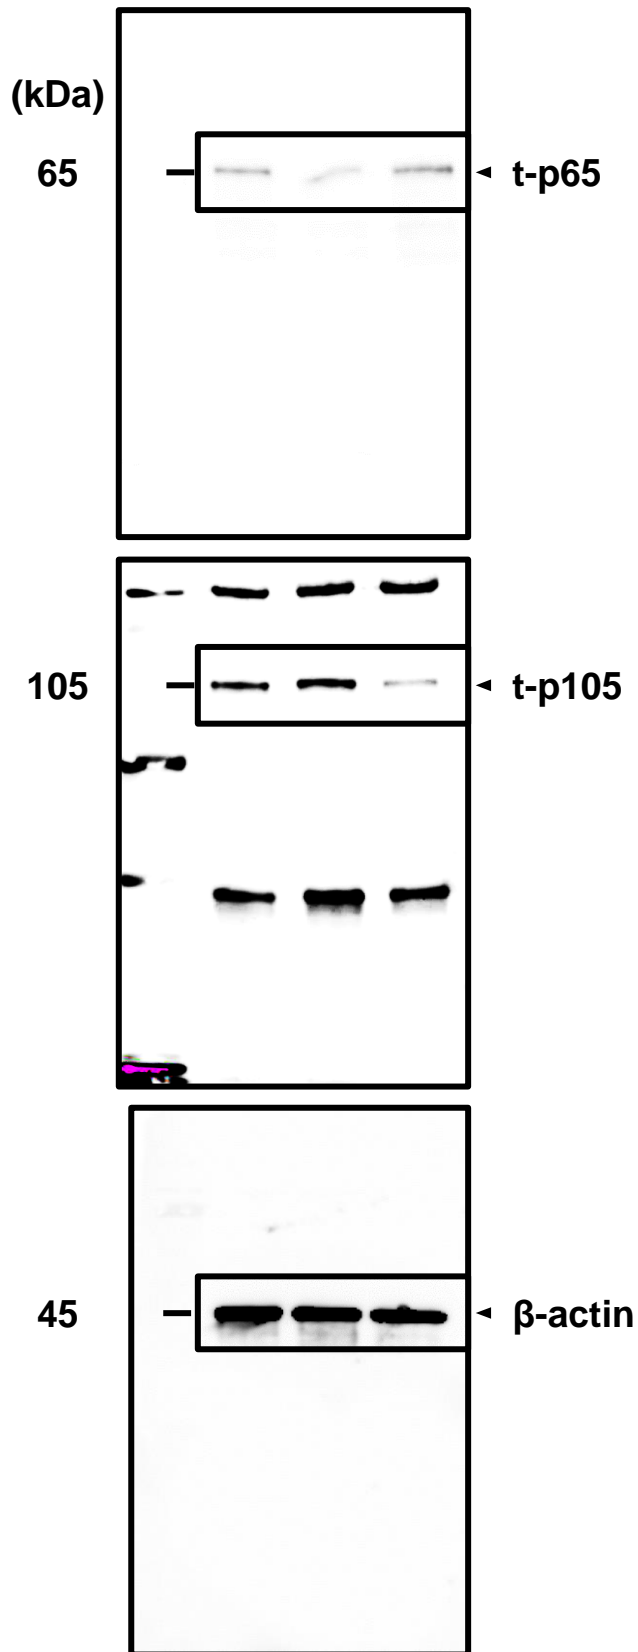

|                   |          |          |          |
|-------------------|----------|----------|----------|
| <b>Scramble</b>   | <b>+</b> | <b>-</b> | <b>-</b> |
| <b>p65 siRNA</b>  | <b>-</b> | <b>+</b> | <b>-</b> |
| <b>p105 siRNA</b> | <b>-</b> | <b>-</b> | <b>+</b> |

Uncropped images for the blots shown in Fig. 5a
